# Supplementary material for: Retinal arterial pulsation as an indicator of raised intraocular pressure
Source: PubMed Central journal article supplement — SAGE Open Med Case Rep. 2021 Oct 26;9:2050313X211054633. doi: 10.1177/2050313X211054633 (PMC8552402; doi:10.1177/2050313x211054633), 2021-10-26
Supplement: sj-pdf-1-sco-10.1177_2050313X211054633.pdf [file sj-pdf-1-sco-10.1177_2050313X211054633.pdf]

Supplementary material instructions:

Spontaneous venous pulsation video:

Note video has been compressed with the H.264 codec using standard settings as requested (previously an mkv file).

Title – ‘Spontaneous Venous Pulsation Video’ – Supplemental material for *Retinal arterial pulsation as an indicator of raised intraocular pressure – case report*.

Description – Supplemental material, ‘Spontaneous Venous Pulsation Video’ for *Retinal arterial pulsation as an indicator of raised intraocular pressure – case report* by Berrett G, Hogg J, Innes W in SAGE Open Medical Case Reports. This video depicts an infra-red en-face video of the optic nerve head showing spontaneous retinal venous pulsation.

Private link on figshare - <https://figshare.com/s/7964c14de4feb186128a>

Provisional DOI - 10.6084/m9.figshare.16645984

This can be formally published and linked to the article if accepted.

Retinal arterial pulsation video:

Note video has been compressed with the H.264 codec using standard settings as requested (previously an avi file).

Title – ‘Retinal Artery Pulsation Video’ – Supplemental material for *Retinal arterial pulsation as an indicator of raised intraocular pressure – case report*.

Description – Supplemental material, ‘Retinal Artery Pulsation Video’ for *Retinal arterial pulsation as an indicator of raised intraocular pressure – case report* by Berrett G, Hogg J, Innes W in SAGE Open Medical Case Reports. This video depicts an infra-red en-face video of the left optic nerve head showing spontaneous retinal arterial pulsation.

Private link on figshare - <https://figshare.com/s/b888e0fdad5ac0b403c2>

Provisional DOI - 10.6084/m9.figshare.14229791

This can be formally published and linked to the article if accepted.
